# Supplementary material
Source: bioRxiv or medRxiv preprint supplement (https://medrxiv.org/highwire/filestream/97041/field_highwire_adjunct_files/5/2020.09.11.20187369-6.pdf)
Supplement: Supplementary file [file 2020.09.11.20187369-6.pdf]

Supplementary Tables

Supplementary Table 1. Clinical characteristics of the patients in cohort 1 (related to Figure 1)

| Patient-ID | Sex    | Ethnicity | Age   | Smoker            | Comorbidities                                                                                                                                   | Days from Admission to | WHO Scale |
|------------|--------|-----------|-------|-------------------|-------------------------------------------------------------------------------------------------------------------------------------------------|------------------------|-----------|
| 001        | male   | caucasian | 70-79 | ex smoker (50 PY) | Hypertension, COPD, carotic artery stenosis, abdominal aortic replacement                                                                       | 4                      | 4         |
| 002        | male   | caucasian | 50-59 | no                | none                                                                                                                                            | 20                     | 8         |
| 003        | female | caucasian | 80-89 | no                | colorectal cancer with pulmonary metastases                                                                                                     | 10                     | 8         |
| 004        | male   | caucasian | 60-59 | no                | Hypertension                                                                                                                                    | 5                      | 4         |
| 005        | male   | caucasian | 40-49 | no                | Asthma bronciale, Psoriasis, Diabetes mellitus type II                                                                                          | 5                      | 4         |
| 006        | male   | caucasian | 70-79 | no                | Hypertension                                                                                                                                    | 1                      | 4         |
| 007        | male   | caucasian | 20-29 | no                | none                                                                                                                                            | -                      | 2         |
| H001       | male   | caucasian | 50-59 | no                | none                                                                                                                                            | -                      | 0         |
| H002       | female | caucasian | 40-49 | no                | none                                                                                                                                            | -                      | 0         |
| H003       | male   | caucasian | 50-59 | no                | none                                                                                                                                            | -                      | 0         |
| H004       | male   | caucasian | 60-69 | no                | none                                                                                                                                            | -                      | 0         |
| 008        | female | caucasian | 60-69 | no                | solid renal transplant, glomerulonephritis,                                                                                                     | 1                      | 4         |
| 009        | male   | caucasian | 50-59 | no                | NASH, Hypertriglyceremia, Hypercholesterolemia, Hyperuricemia                                                                                   | 2                      | 4         |
| 010        | male   | caucasian | 70-79 | no                | Renal insufficiency requiring dialysis, Hypertension, Diabetes mellitus type II, recurrent infection of chronic osteomyelitis, aortic sclerosis | 1                      | 4         |
| 011        | female | caucasian | 70-79 | no                | atrial fibrillation, condition after several strokes, right paraventricular mass with perifocal                                                 | -                      | 3         |
| 012        | female | caucasian | 50-59 | no                | Covid-19 associated Aspergillosis, Candidaemia, AKI, Sepsis, Herpes labialis                                                                    | 1                      | 6         |
| 013        | female | caucasian | 60-69 | no                | Obesity, Hypertension, Diabetes mellitus type II, Hypercholesterinemia, Hypothyreosis, breast cancer (20 years ago)                             | 1                      | 4         |
| 014        | female | asian     | 50-59 | no                | Diabetes mellitus type II, schizophrenia, HIV                                                                                                   | -                      | 5         |

Continued:

| Patient-ID | CRP range [mg/l] | IL-6 range [ng/l] | Ferritin range | Specific Treatment            | Antiinfective Treatment                | Other Medication                                                                     | Max disease          |
|------------|------------------|-------------------|----------------|-------------------------------|----------------------------------------|--------------------------------------------------------------------------------------|----------------------|
| 001        | 9,0 - 100,1      | 14,1 - 135,0      | 710 - 2725     | Remdesivir                    | Sultamicillin                          | ASS, Ramipril, Atorvastatin, Tamsulosin, Ultibro                                     | early convalescence  |
| 002        | 12,96 - 358,0    | 52,6 - 2905       | 1295 - 8000    | Remdesivir                    | Piperacillin/Tazobactam                | none                                                                                 | Critical (fatal)     |
| 003        | 50,6 - 169,0     | 289,0 - 579,0     | 1118 - 1224    | none                          | Piperacillin/Tazobactam, Ciprofloxacin | Chemotherapy (FOLFIRI), metoprolol, Opipramol, Novaminsulfon, L-Thyroxin, Betahistin | Critical (fatal)     |
| 004        | 34,3 - 241,0     | 41,7 - 324,0      | 1239 - 2354    | Remdesivir                    | Sultamicillin                          | Atorvastatin                                                                         | complicated          |
| 005        | 4,3 - 168,0      | 4,2 - 173,0       | 457 - 1184     | Remdesivir                    | none                                   | Metformin, Actraphane, Oxis Inhaler, Spiolto, Flutide                                | late convalescence   |
| 006        | 0,5 - 49,2       | 17,6 - 69,0       | 666 - 2378     | Remdesivir                    | none                                   | Atenolol, Lisinopril                                                                 | long-term follow-up  |
| 007        | -                | -                 | -              | none                          | none                                   | none                                                                                 | Not infected control |
| H001       | -                | -                 | -              | none                          | none                                   | none                                                                                 | Not infected control |
| H002       | -                | -                 | -              | none                          | none                                   | none                                                                                 | Not infected control |
| H003       | -                | -                 | -              | none                          | none                                   | none                                                                                 | Not infected control |
| H004       | -                | -                 | -              | none                          | none                                   | none                                                                                 | Not infected control |
| 008        | 41,9 - 217,3     | 9,0 - 43,0        | 909-1071       | none                          |                                        | Ciclosporin, Azathioprin,                                                            | complicated          |
| 009        | 5,5 - 115,7      | 4,0 - 38,0        | 1618-1901      | none                          | none                                   | none                                                                                 | early convalescence  |
| 010        | 41,7 - 287,6     | 31,0 - 574,0      | 802-4574       | none                          | none                                   | Enalapril, Amlodipin, Metoprolol, Torem, ASS, Sevelamercarbon                        | complicated          |
| 011        | 0,5 - 6,1        | 2,0 - 6,0         | 210 - 331      | none                          | none                                   | Eliquis, HCT, Amlodipin, Valsartan, Simvastatin.                                     | recovery             |
| 012        | 2,1 - 347,5      | 62,0 - 311,0      | 368 - 1090     | Ribavirin +Lopinavir/r        | Caspofungin                            | Bisoprolol, Ramipril, Famotidin, Enoxaparin                                          | Critical             |
| 013        | 1,0 - 144,2      | 48,0 - 70,0       | 815 - 2336     | Tocilizumab/Plac ebo (WA42380 | none                                   | ASS, L-Thyroxin, Metformin,                                                          | complicated          |
| 014        | 25,8 - 110,6     | 27,0 - 46,0       | 216 - 711      | Tocilizumab/Plac ebo (WA42380 | none                                   | Triumeq, Trevicta                                                                    | complicated          |

Continued:

| Patient-ID | Sampling day since symptom onset | Longitudinal time point | PBMC           |                      | PAX         | Buffy/DNA           | Serum      |                          |
|------------|----------------------------------|-------------------------|----------------|----------------------|-------------|---------------------|------------|--------------------------|
|            |                                  |                         | Flow cytometry | single cell genomics | bulk RNAseq | methylome, GSA (d1) | Antibodies | cytokine multiplex ELISA |
| 001        | 8                                | d1                      |                | x                    | x           | x                   | x          | x                        |
|            | 10                               | d3                      | x              | x                    | x           | x                   | x          | x                        |
|            | 15                               | d8                      | x              | x                    | x           | x                   | x          | x                        |
|            | 18                               | d11                     |                |                      | x           | x                   | x          | x                        |
|            | 21                               | d14                     | x              | x                    | x           | x                   | x          | x                        |
| 002        | 19                               | d1                      | x              | x                    | x           | x                   | x          | x                        |
|            | 21                               | d3                      | x              | x                    | x           | x                   | x          | x                        |
| 003        | 12                               | d1                      | x              | x                    | x           | x                   | x          | x                        |
| 004        | 9                                | d1                      | x              | x                    | x           | x                   | x          | x                        |
|            | 11                               | d3                      | x              | x                    | x           | x                   | x          | x                        |
|            | 16                               | d8                      | x              | x                    | x           | x                   | x          | x                        |
| 005        | 6                                | d1                      | x              | x                    | x           | x                   | x          | x                        |
|            | 8                                | d3                      | x              | x                    | x           | x                   | x          | x                        |
|            | 13                               | d8                      | x              | x                    | x           | x                   | x          | x                        |
|            | 16                               | d11                     |                |                      | x           | x                   | x          | x                        |
| 006        | 12                               | d1                      | x              | x                    | x           | x                   | x          | x                        |
|            | 14                               | d3                      | x              | x                    | x           | x                   | x          | x                        |
|            | 19                               | d8                      | x              | x                    | x           | x                   | x          | x                        |
|            | 44                               | d33                     | x              | x                    | x           |                     | x          | x                        |
| 007        | 45                               | d1                      | x              | x                    | x           | x                   | x          | x                        |
| H001       | -                                | d1                      |                |                      | x           |                     |            |                          |
| H002       | -                                | d1                      |                | x                    | x           |                     |            |                          |
| H003       | -                                | d1                      |                |                      | x           |                     |            |                          |
| H004       | -                                | d1                      |                | x                    | x           |                     |            |                          |
| 008        | 18                               | d1                      |                | x                    | x           |                     | x          |                          |
|            | 21                               | d4                      |                |                      |             |                     |            |                          |
| 009        | 18                               | d1                      |                | x                    | x           |                     |            |                          |
|            | 20                               | d3                      |                |                      | x           |                     |            |                          |
|            | 24                               | d7                      |                | x                    | x           |                     |            |                          |
| 010        | 9                                | d1                      |                | x                    | x           |                     | x          |                          |
|            | 14                               | d6                      |                |                      | x           |                     |            |                          |
|            | 16                               | d8                      |                | x                    | x           |                     |            |                          |
|            | 20                               | d12                     |                |                      | x           |                     | x          |                          |
|            | 24                               | d16                     |                | x                    | x           |                     |            |                          |
| 011        | 4                                | d1                      |                | x                    | x           |                     | x          |                          |
|            | 7                                | d4                      |                |                      | x           |                     |            |                          |
|            | 11                               | d8                      |                | x                    | x           |                     | x          |                          |
|            | 14                               | d11                     |                |                      | x           |                     | x          |                          |
| 012        | 29                               | d1                      |                | x                    | x           |                     |            |                          |
|            | 36                               | d8                      |                | x                    | x           |                     |            |                          |
|            | 43                               | d15                     |                |                      | x           |                     |            |                          |
|            | 50                               | d22                     |                | x                    | x           |                     |            |                          |
|            | 57                               | d29                     |                |                      | x           |                     |            |                          |
| 013        | 5                                | d1                      |                | x                    | x           |                     | x          |                          |
|            | 12                               | d8                      |                | x                    | x           |                     |            |                          |
| 014        | 46                               | d1                      |                | x                    | x           |                     | x          |                          |
|            | 48                               | d3                      |                |                      | x           |                     | x          |                          |
